# Supplementary material for: Analysis of DNA hybridization regarding the conformation of molecular layer with piezoelectric microcantilevers
Source: Royal Society of Chemistry journal article supplement (doi:10.1039/c0lc00122h), 2010-11-09

## Analysis of DNA hybridization regarding the conformation of molecular layer with piezoelectric microcantilevers

Shun Zheng, Jun Hwan Choi, Sang-Myung Lee, Kyo Seon Hwang, Sang Kyung Kim,<sup>\*a</sup> Tae Song

Kim<sup>\*b</sup>

Supplementary Fig. 1 Schematic of LDV system (a), image of liquid cell (b) and PZT-embedded microcantilever (c).

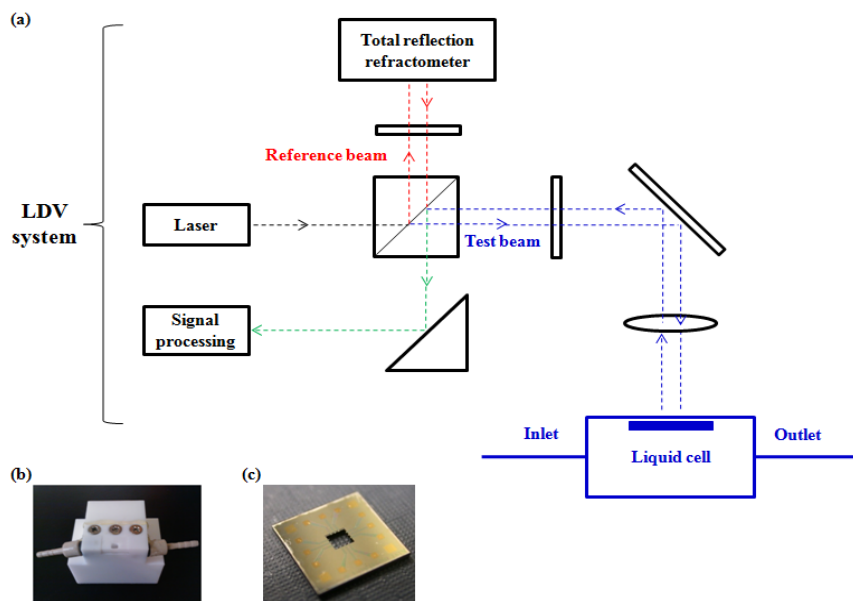

Supplementary Fig. 2 Cantilever oscillation in various aqueous environment. DW: flow rate 2.5 mL/h; PBS buffer: NaCl 137mM, KCl 2.7 mM, Na<sub>2</sub>HPO<sub>4</sub> 10 mM, KH<sub>2</sub>PO<sub>4</sub> 1.76 mM, pH 7.4; TE buffer: 10 mM Tris, 1 mM EDTA, pH 7.4; Tris+NaCl buffer: Tris 10 mM, NaCl 140 mM, pH 7.4; Tris buffer: Tris 100 mM, pH 7.4. Inset shows the peak quality of resonating microcantilever before and after buffer test.

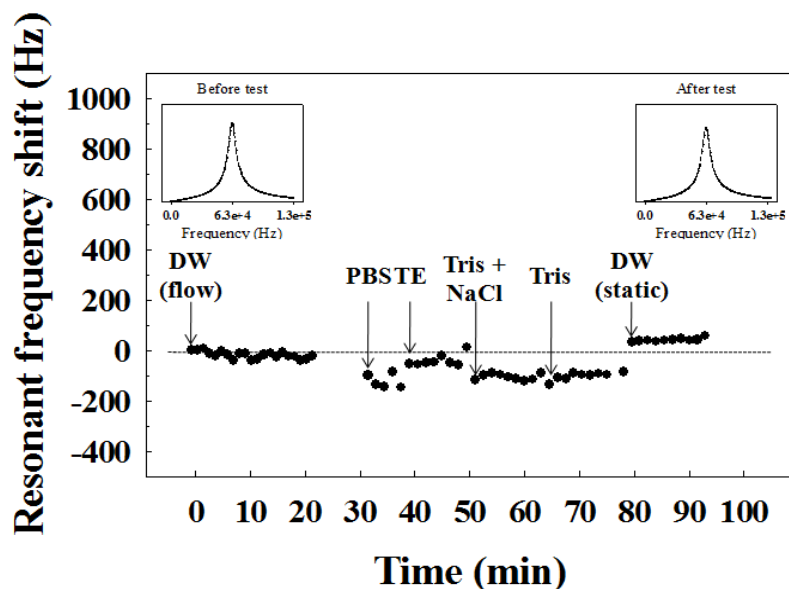

Supplementary Fig. 3 Length comparison between HP0 and HP10.

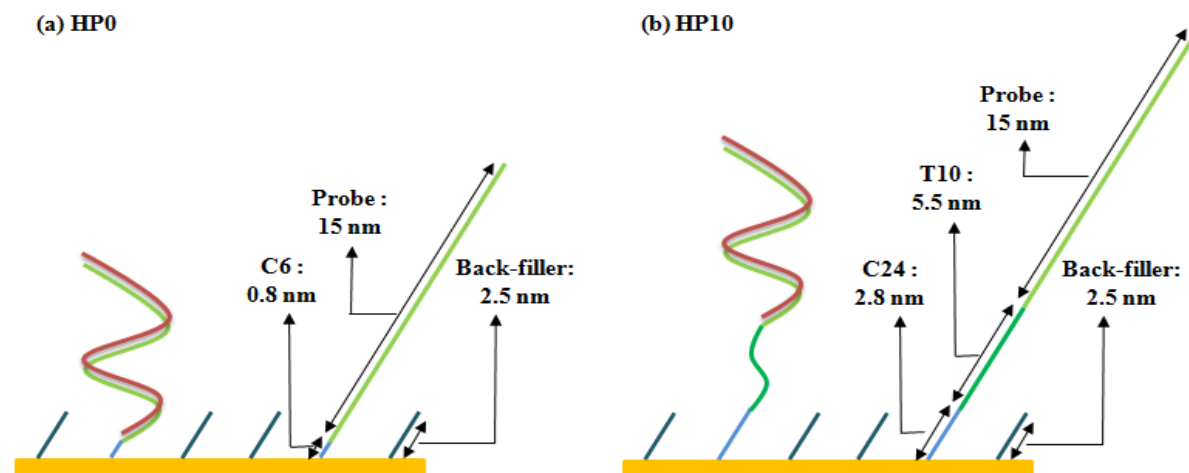

Supplement: c0lc00122h.pdf [file c0lc00122h.pdf]
